# Supplementary material for: Adherence to Child Feeding Practices and Child Growth: A Retrospective Cohort Analysis in Cambodia
Source: PubMed Central journal article supplement (PMC7823716; doi:10.3390/nu13010137), 2020-12-31
Supplement: nutrients-13-00137-s001.pdf [file nutrients-13-00137-s001.pdf]

**Supplementary Table S1:** The relationship of adherence to age-appropriate feeding practices and other determinants with child Height-for-Age (HAZ).

| HAZ                                      |                                                                           |                 |         |                                                                    |                 |         |                                                                    |                 |         |
|------------------------------------------|---------------------------------------------------------------------------|-----------------|---------|--------------------------------------------------------------------|-----------------|---------|--------------------------------------------------------------------|-----------------|---------|
|                                          | Model 1 <sup>a</sup>                                                      |                 |         | Model 2 <sup>b</sup>                                               |                 |         | Model 3 <sup>c</sup>                                               |                 |         |
| Full adjusted model                      | Total number of adherence to MDD or MMF<br>(n=1,918 ; observations=8,873) |                 |         | Total number of adherence to MAD<br>(n=1,918 ; observations=8,873) |                 |         | Total number of adherence to ADF<br>(n=1,918 ; observations=8,873) |                 |         |
| Fixed effects                            | Cof                                                                       | 95CI %          | p-Value | Cof                                                                | 95CI %          | p-Value | Cof                                                                | 95CI %          | p-Value |
| Sex (boy)                                | -0.10                                                                     | -0.16 - -0.05   | <0.001  | -0.12                                                              | -0.16 - -0.05   | <0.001  | -0.11                                                              | -0.16 - -0.05   | <0.001  |
| Age (in month)                           | -0.10                                                                     | -0.10 - -0.09   | <0.001  | -0.10                                                              | -0.10 - -0.09   | <0.001  | -0.10                                                              | -0.10 - -0.09   | <0.001  |
| Age <sup>2</sup> (in month)              | 0.002                                                                     | 0.0015 - 0.0019 | <0.001  | 0.002                                                              | 0.0015 - 0.0019 | <0.001  | 0.002                                                              | 0.0015 - 0.0018 | <0.001  |
| Total number of adherence to MDD (Never) |                                                                           |                 |         |                                                                    |                 |         |                                                                    |                 |         |
| 1 or 2 times                             | 0.09                                                                      | 0.02 - 0.17     | 0.010   |                                                                    |                 |         |                                                                    |                 |         |
| 3 or always                              | 0.10                                                                      | -0.01 - 0.20    | 0.070   |                                                                    |                 |         |                                                                    |                 |         |
| Total number of adherence to MMF(Never)  |                                                                           |                 |         |                                                                    |                 |         |                                                                    |                 |         |
| 1 or 2 times                             | -0.16                                                                     | -0.30 - -0.01   | 0.031   |                                                                    |                 |         |                                                                    |                 |         |
| 3 or always                              | -0.30                                                                     | -0.45 - -0.15   | <0.001  |                                                                    |                 |         |                                                                    |                 |         |
| Total number of adherence to MAD (Never) |                                                                           |                 |         |                                                                    |                 |         |                                                                    |                 |         |
| 1 or 2 times                             |                                                                           |                 |         | 0.01                                                               | -0.05 - 0.08    | 0.710   |                                                                    |                 |         |
| 3 or always                              |                                                                           |                 |         | -0.09                                                              | -0.20 - 0.02    | 0.095   |                                                                    |                 |         |
| Total number of adherence to ADF(Never)  |                                                                           |                 |         |                                                                    |                 |         |                                                                    |                 |         |
| 1 or 2 times                             |                                                                           |                 |         |                                                                    |                 |         | -0.001                                                             | -0.07 - 0.07    | 0.985   |
| 3 or always                              |                                                                           |                 |         |                                                                    |                 |         | 0.38                                                               | 0.26 - 0.50     | <0.001  |
| Maternal education (years)               | 0.04                                                                      | 0.03 - 0.04     | <0.001  | 0.03                                                               | 0.03 - 0.04     | <0.001  | 0.03                                                               | 0.02 - 0.04     | <0.001  |
| Wealth index                             | 0.10                                                                      | 0.07 - 0.12     | <0.001  | 0.10                                                               | 0.07 - 0.12     | <0.001  | 0.10                                                               | 0.08 - 0.12     | <0.001  |
| Caretaker drinking water was treated     | 0.09                                                                      | 0.01 - 0.16     | 0.023   | 0.09                                                               | 0.02 - 0.12     | 0.016   | 0.08                                                               | 0.01 - 0.16     | <0.001  |
| Improved toilet                          | 0.13                                                                      | 0.06 - 0.19     | <0.001  | 0.14                                                               | 0.07 - 0.21     | <0.001  | 0.14                                                               | 0.07 - 0.21     | <0.001  |
| <b>Random effect</b>                     |                                                                           |                 |         |                                                                    |                 |         |                                                                    |                 |         |
| Variances of random intercept            | 0.04                                                                      | 0.01 - 0.193    |         | 0.04                                                               | 0.01 - 0.21     |         | 0.04                                                               | 0.008 - 0.21    |         |
| Variance of random slope                 | 0.003                                                                     | 0.002 - 0.003   |         | 0.003                                                              | 0.002 - 0.003   |         | 0.003                                                              | 0.002 - 0.003   |         |
| Variance of residuals                    | 0.62                                                                      | 0.60 - 0.64     |         | 0.62                                                               | 0.60 - 0.64     |         | 0.62                                                               | 0.60 - 0.64     |         |
| Log-likelihood                           |                                                                           | -12183.22       |         |                                                                    | -12195.77       |         |                                                                    | -12175.54       |         |
| LR test                                  |                                                                           |                 | <0.001  |                                                                    |                 | <0.001  |                                                                    |                 | <0.001  |

<sup>a</sup> Model 1 presents linear mixed-effects model of the relationship between adherence to MDD or MMF and other determinants with HAZ.

<sup>b</sup> Model 2 presents linear mixed-effects model of the relationship between adherence to MAD and other determinants with HAZ.

<sup>c</sup> Model 3 presents linear mixed-effects model of the relationship between adherence of ADF and other determinants with HAZ.

MDD= minimum dietary diversity, MMF= minimum meal frequency; MAD=minimum acceptable diet; and ADF=age-appropriate daily feeding.

**Supplementary Table S2:** The relationship of adherence to age-appropriate feeding practices and other determinants with child Weight-for-Height (WHZ).

| WHZ                                      |                                                                          |                 |                  |                                                                    |                |                  |                                                                    |               |                  |
|------------------------------------------|--------------------------------------------------------------------------|-----------------|------------------|--------------------------------------------------------------------|----------------|------------------|--------------------------------------------------------------------|---------------|------------------|
| Full adjusted model                      | Model 1 <sup>a</sup>                                                     |                 |                  | Model 2 <sup>b</sup>                                               |                |                  | Model 3 <sup>c</sup>                                               |               |                  |
|                                          | Total number of adherence to MDD or MMF<br>(n=1,995; observations=9,231) |                 |                  | Total number of adherence to MDA<br>(n=1,995; observations= 9,231) |                |                  | Total number of adherence to ADF<br>(n=1,995; observations= 9,231) |               |                  |
| Fixed effects                            | Cof                                                                      | 95CI %          | <i>p-Value</i>   | Cof                                                                | 95CI %         | <i>p-Value</i>   | Cof                                                                | 95CI %        | <i>p-Value</i>   |
| Sex (boy)                                | -0.06                                                                    | -0.11 - -0.01   | <b>0.020</b>     | -0.06                                                              | -0.11 - -0.01  | <b>0.015</b>     | -0.06                                                              | -0.11 - -0.01 | <b>0.018</b>     |
| Age (in month)                           | -0.05                                                                    | -0.05 - -0.04   | <b>&lt;0.001</b> | -0.05                                                              | -0.05 - -0.04  | <b>&lt;0.001</b> | -0.05                                                              | -0.06 - -0.04 | <b>&lt;0.001</b> |
| Age <sup>2</sup> (in months)             | 0.001                                                                    | 0.0009 - 0.0012 | <b>&lt;0.001</b> | 0.001                                                              | 0.0008 - 0.001 | <b>&lt;0.001</b> | 0.001                                                              | 0.009 - 0.001 | <b>&lt;0.001</b> |
| Total number of adherence to MDD (Never) |                                                                          |                 |                  |                                                                    |                |                  |                                                                    |               |                  |
| 1 or 2 times                             | 0.13                                                                     | 0.07 - 0.19     | <b>&lt;0.001</b> |                                                                    |                |                  |                                                                    |               |                  |
| 3 or always                              | 0.23                                                                     | 0.13 - 0.32     | <b>&lt;0.001</b> |                                                                    |                |                  |                                                                    |               |                  |
| Total number of adherence to MMF(Never)  |                                                                          |                 |                  |                                                                    |                |                  |                                                                    |               |                  |
| 1 or 2 times                             | 0.04                                                                     | -0.09 - 0.16    | <b>0.568</b>     |                                                                    |                |                  |                                                                    |               |                  |
| 3 or always                              | -0.03                                                                    | -0.16 - 0.10    | <b>0.636</b>     |                                                                    |                |                  |                                                                    |               |                  |
| Total number of adherence to MAD (Never) |                                                                          |                 |                  |                                                                    |                |                  |                                                                    |               |                  |
| 1 or 2 times                             |                                                                          |                 |                  | 0.10                                                               | 0.05 - 0.16    | <b>&lt;0.001</b> |                                                                    |               |                  |
| 3 or always                              |                                                                          |                 |                  | 0.17                                                               | 0.08 - 0.27    | <b>&lt;0.001</b> |                                                                    |               |                  |
| Total number of adherence to ADF (Never) |                                                                          |                 |                  |                                                                    |                |                  |                                                                    |               |                  |
| 1 or 2 times                             |                                                                          |                 |                  |                                                                    |                |                  | 0.02                                                               | -0.04 - 0.07  | <b>0.613</b>     |
| 3 or always                              |                                                                          |                 |                  |                                                                    |                |                  | 0.03                                                               | -0.08 - .14   | <b>0.609</b>     |
| Maternal education (years)               | 0.01                                                                     | 0.001 - 0.02    | <b>0.030</b>     | 0.01                                                               | 0.001 - 0.02   | <b>0.022</b>     | 0.009                                                              | 0.001 - 0.02  | <b>0.019</b>     |
| Wealth index                             | 0.09                                                                     | 0.07 - 0.11     | <b>&lt;0.001</b> | 0.09                                                               | 0.07 - 0.11    | <b>&lt;0.001</b> | 0.09                                                               | 0.07 - 0.11   | <b>&lt;0.001</b> |
| <b>Random effects</b>                    |                                                                          |                 |                  |                                                                    |                |                  |                                                                    |               |                  |
| Variances of random intercept            | 0.01                                                                     | 0.001 - 0.04    |                  | 0.01                                                               | 0.001 - 0.04   |                  | 0.01                                                               | 0.001 - 0.04  |                  |
| Variance of random slope                 | 0.002                                                                    | 0.001 - 0.002   |                  | 0.002                                                              | 0.001 - 0.002  |                  | 0.002                                                              | 0.001 - 0.002 |                  |
| Variance of residuals                    | 0.59                                                                     | 0.57 - 0.61     |                  | 0.587                                                              | 0.57 - 0.61    |                  | 0.59                                                               | 0.57 - 0.61   |                  |
| Log-likelihood                           |                                                                          | -12075.77       |                  |                                                                    | -12080.43      |                  |                                                                    | -12089.34     |                  |
| LR test                                  |                                                                          |                 | <b>&lt;0.001</b> |                                                                    |                | <b>&lt;0.001</b> |                                                                    |               | <b>&lt;0.001</b> |

<sup>a</sup> Model 1 presents linear mixed-effects model of the relationship between adherence to MDD or MMF and other determinants with WHZ.

<sup>b</sup> Model 2 presents linear mixed-effects model of the relationship between adherence to MAD and other determinants with WHZ.

<sup>c</sup> Model 3 presents linear mixed-effects model of the relationship between adherence to ADF and other determinants with WHZ.

MDD= minimum dietary diversity, MMF= minimum meal frequency; MAD=minimum acceptable diet; and ADF=age-appropriate daily feeding.

**Supplementary Table S3:** The relationship of adherence to age-appropriate feeding practices and other determinants with child concurrence wasting and stunting (WaSt).

| WaSt                                     |                                                                       |               |         |                                                                |               |         |                                                                |              |         |
|------------------------------------------|-----------------------------------------------------------------------|---------------|---------|----------------------------------------------------------------|---------------|---------|----------------------------------------------------------------|--------------|---------|
|                                          | Model 1 <sup>a</sup>                                                  |               |         | Model 2 <sup>b</sup>                                           |               |         | Model 3 <sup>c</sup>                                           |              |         |
| Full adjusted model                      | Total number of adherence to MDD or MMF (n=1,995; observations=9,231) |               |         | Total number of adherence to MAD (n=1,995; observations=9,231) |               |         | Total number of adherence to ADF (n=1,995; observations=9,231) |              |         |
| Fixed effect                             | AOR                                                                   | 95CI %        | p-Value | AOR                                                            | 95CI %        | p-Value | AOR                                                            | 95CI %       | p-Value |
| Age (in month)                           | 1.40                                                                  | 1.30 - 1.50   | <0.001  | 1.40                                                           | 1.30 - 1.50   | <0.001  | 1.39                                                           | 1.29 - 1.50  | <0.001  |
| Age <sup>2</sup> (in months)             | 0.992                                                                 | 0.991 - 0.995 | <0.001  | 0.993                                                          | 0.991 - 0.994 | <0.001  | 0.992                                                          | 0.990 - .994 | <0.001  |
| Total number of adherence to MDD (Never) |                                                                       |               |         |                                                                |               |         |                                                                |              |         |
| 1 or 2 times                             | 0.71                                                                  | 0.37 - 1.34   | 0.286   |                                                                |               |         |                                                                |              |         |
| 3 or always                              | 0.74                                                                  | 0.26 - 2.05   | 0.558   |                                                                |               |         |                                                                |              |         |
| Total number of adherence to MMF(Never)  |                                                                       |               |         |                                                                |               |         |                                                                |              |         |
| 1 or 2 times                             | 0.54                                                                  | 0.14 - 2.06   | 0.370   |                                                                |               |         |                                                                |              |         |
| 3 or always                              | 0.97                                                                  | 0.25 - 3.73   | 0.969   |                                                                |               |         |                                                                |              |         |
| Total number of adherence to MAD (Never) |                                                                       |               |         |                                                                |               |         |                                                                |              |         |
| 1 or 2 times                             |                                                                       |               |         | 0.85                                                           | 0.47 - 1.56   | 0.619   |                                                                |              |         |
| 3 or always                              |                                                                       |               |         | 1.23                                                           | 0.43 - 3.50   | 0.703   |                                                                |              |         |
| Total number of adherence to ADF(Never)  |                                                                       |               |         |                                                                |               |         |                                                                |              |         |
| 1 or 2 times                             |                                                                       |               |         |                                                                |               |         | 1.27                                                           | 0.68 - 2.37  | 0.451   |
| 3 or always                              |                                                                       |               |         |                                                                |               |         | 0.45                                                           | 0.09 - 2.30  | 0.338   |
| Maternal education (years)               | 0.83                                                                  | 0.76 - 0.90   | <0.001  | 0.82                                                           | 0.76 - 0.90   | <0.001  | 0.83                                                           | 0.76 - 0.90  | <0.001  |
| Wealth index                             | 0.59                                                                  | 0.46 - 0.74   | <0.001  | 0.59                                                           | 0.46 - 0.74   | <0.001  | 0.58                                                           | 0.46 - 0.73  | <0.001  |
| <b>Random effect</b>                     |                                                                       |               |         |                                                                |               |         |                                                                |              |         |
| Variances of random intercept            | 10.20                                                                 | 7.55 - 13.78  |         | 10.26                                                          | 7.59 - 13.87  |         | 10.17                                                          | 7.53 - 13.74 |         |
| Log-likelihood                           |                                                                       | -1192.66      |         |                                                                | -1194.69      |         |                                                                | -1193.81     |         |
| LR test                                  |                                                                       |               | <0.001  |                                                                |               | <0.001  |                                                                |              | <0.001  |

<sup>a</sup> Model 1 presents mixed-effects logistic regression of the relationship between adherence to MDD or MMF and other determinants with WaSt.

<sup>b</sup> Model 2 presents mixed-effects logistic regression of the relationship between adherence to MAD and other determinants with WaSt.

<sup>c</sup> Model 3 presents mixed-effects logistic regression of the relationship between adherence to ADF and other determinants with WaSt.

MDD= minimum dietary diversity, MMF= minimum meal frequency, MAD=minimum acceptable diet; ADF=age-appropriate daily feeding.
